# Supplementary material for: Barriers and facilitators to change in the organisation and delivery of endoscopy services in England and Wales: a focus group study
Source: HighWire-hosted journal article supplement (doi:10.1136/bmjopen-2012-001009), 2012-01-01
Supplement: bmjopen-2012-001009-s1.pdf [file bmjopen-2012-001009-s1.pdf]

RATS guidelines have been adhered to:

R Relevance – research question explicitly stated

Research question linked to existing knowledge, current literature aims and objectives

A Appropriate – Focus Groups considered the most appropriate method of data collection, for non-sensitive topic, and convenient for a sample of busy gastroenterologists

T Transparent – Sampling strategy was transparent. Purposive sampling allowed for a wide-range of views from a mixture of gastroenterology specialists working in the field of endoscopy

S Sound – Analysis linked to methods of data collection. Groupwork with a range of health professionals, qualitative methodologists, academics and researchers using summative and thematic analysis techniques, facilitated by the lead methodologist (a qualitative research expert) ensured that the most appropriate approach was employed for considering rich in-depth material by the team.
